# Supplementary material for: Superior piezoelectricity and resistivity in CaBi2Nb2O9 high-temperature piezoelectric ceramics: synergy of structural distortion and weak texturing
Source: Royal Society of Chemistry journal article supplement (doi:10.1039/d2tc03598g), 2022-01-01
Supplement: d2tc03598g1.pdf [file d2tc03598g1.pdf]

## Supplementary Information for

# **Superior piezoelectricity and resistivity in $\text{CaBi}_2\text{Nb}_2\text{O}_9$ high-temperature piezoelectric ceramics: Synergy of structural distortion and weak textured**

C. B. Pan<sup>a,b</sup>, G. C. Zhao<sup>a,b</sup>, S. M. Li<sup>a,b</sup>, X.L. Wang<sup>a,b</sup>, J. M. Z. Wang<sup>a,b</sup>, M. Tao<sup>a,b</sup>, X. K. Zhang<sup>c</sup>, C. Yang<sup>d,e</sup>, J. P. Xu<sup>c</sup>, W. Yin<sup>c</sup>, L. H. Yin<sup>a</sup>, W. H. Song<sup>a</sup>, P. Tong<sup>a</sup>, X. B. Zhu<sup>a</sup>, J. Yang<sup>a,\*</sup>, and Y. P. Sun<sup>a,f,g</sup>

*a* Key Laboratory of Materials Physics, Institute of Solid State Physics, Chinese Academy of Sciences, Hefei 230031, People's Republic of China

*b* University of Science and Technology of China, Hefei 230026, People's Republic of China

*c* Spallation Neutron Source Science Center, Dongguan 523803, China

*d* Department of Chemistry, University of Warsaw, 02093, Warsaw, Poland

*e* European Spallation Source, 22484, Lund, Sweden.

*f* High Magnetic Field Laboratory, Chinese Academy of Sciences, Hefei 230031, People's Republic of China

*g* Collaborative Innovation Center of Advanced Microstructures, Nanjing University, Nanjing 210093, People's Republic of China

Corresponding Author E-mail: [jyang@issp.ac.cn](mailto:jyang@issp.ac.cn) (J. Yang)

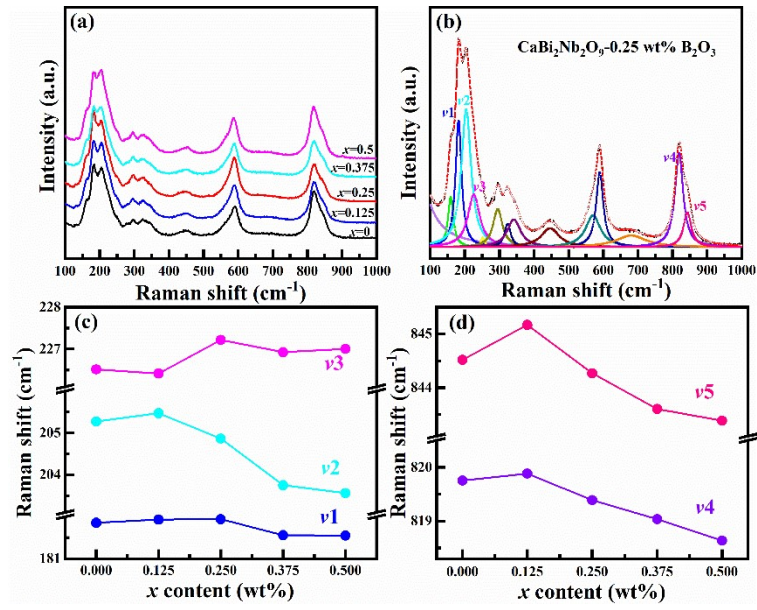

**Fig. S1** (a) Raman patterns of  $\text{CaBi}_2\text{Nb}_2\text{O}_9-x \text{ wt}\% \text{ B}_2\text{O}_3$  ceramics at room temperature.

(b) Lorentz peak fitting of Raman pattern for  $\text{CaBi}_2\text{Nb}_2\text{O}_9-0.25 \text{ wt}\% \text{ B}_2\text{O}_3$  ceramics.

Wave number of Raman peaks with (c)  $\nu_1$ ,  $\nu_2$ ,  $\nu_3$  and (d)  $\nu_4$  and  $\nu_5$ .

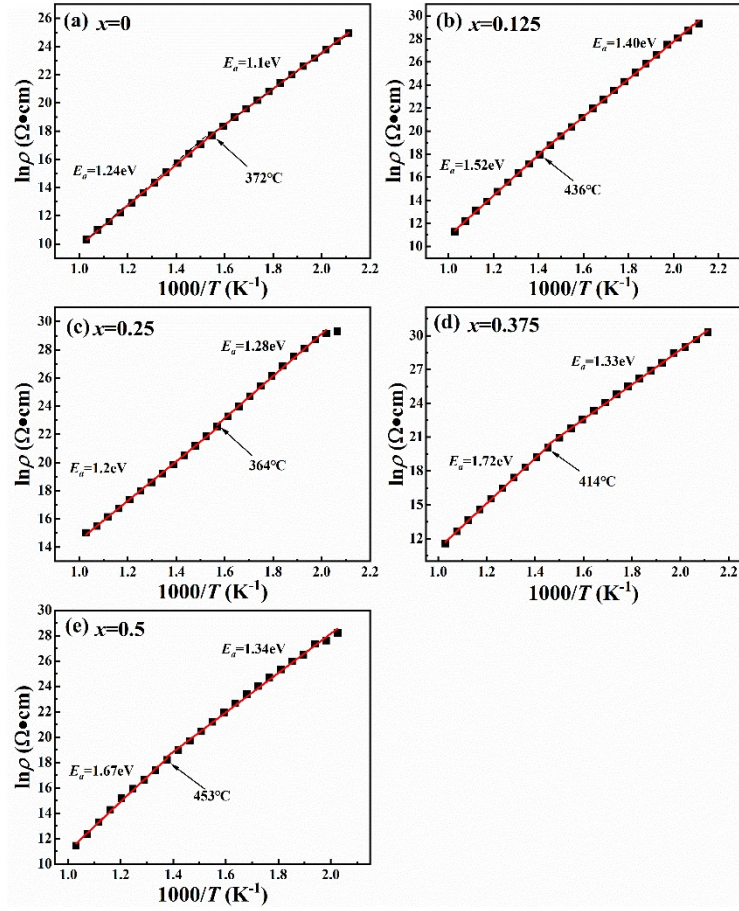

Fig. S2 Arrhenius plots of all the samples.

Table S1. Atomic coordinates of pure CBNO and CaBi<sub>2</sub>Nb<sub>2</sub>O<sub>9</sub>-0.25 wt% B<sub>2</sub>O<sub>3</sub>.

|      |      | CBNO  |       |       |       | CBNO-0.25wt% B <sub>2</sub> O <sub>3</sub> |       |       |       |
|------|------|-------|-------|-------|-------|--------------------------------------------|-------|-------|-------|
| atom | site | x     | y     | z     | Occ   | x                                          | y     | z     | Occ   |
| Ca1  | 4    | 0.253 | 0.745 | 0.5   | 0.891 | 0.245                                      | 0.739 | 0.5   | 0.858 |
| Bi1  | 4    | 0.253 | 0.745 | 0.5   | 0.109 | 0.245                                      | 0.739 | 0.5   | 0.142 |
| Ca2  | 8    | 0.260 | 0.734 | 0.701 | 0.038 | 0.249                                      | 0.744 | 0.700 | 0.085 |
| Bi2  | 8    | 0.260 | 0.734 | 0.701 | 0.962 | 0.249                                      | 0.744 | 0.700 | 0.915 |
| Nb   | 8    | 0.280 | 0.255 | 0.585 | 1     | 0.282                                      | 0.227 | 0.583 | 0.999 |
| O1   | 4    | 0.314 | 0.164 | 0.5   | 1     | 0.302                                      | 0.152 | 0.5   | 1     |
| O2   | 8    | 0.295 | 0.318 | 0.656 | 1     | 0.311                                      | 0.314 | 0.657 | 1     |
| O3   | 8    | 0.485 | 0.501 | 0.249 | 1     | 0.513                                      | 0.503 | 0.247 | 1     |
| O4   | 8    | 0.511 | 0.537 | 0.562 | 1     | 0.538                                      | 0.531 | 0.565 | 1     |
| O5   | 8    | 0.602 | 0.055 | 0.584 | 1     | 0.610                                      | 0.04  | 0.586 | 1     |
| B    | 8    |       |       |       |       | 0.282                                      | 0.227 | 0.583 | 0.001 |
